# Supplementary material for: Factors influencing general practitioners’ perception of and attitude towards dementia diagnostics and care—results of a survey among primary care physicians in Germany
Source: Springer Nature journal article supplement (doi:10.1007/s10354-020-00803-9), 2021-01-14
Supplement: MOESM1 [file 18769682]

**1.** Was sind Ihrer Erfahrung nach häufige Anzeichen einer beginnenden Demenz? Bitte nennen Sie drei wichtige Symptome.

---

---

**2.** Wenn Sie an die Patienten denken, bei denen Sie in den letzten Jahren auf eine (beginnende) Demenz gestoßen sind oder einen (unspezifischen) Demenzverdacht hatten: Was waren die ersten Hinweise, durch die Sie auf das Vorliegen einer möglichen Demenz aufmerksam wurden? (Mehrfachangabe möglich)

- Beschwerden des Patienten selbst    Hinweise Angehöriger    Hinweise des Praxispersonals  
 Eigene Beschäftigung mit dem Patienten  
 Sonstige, und zwar: \_\_\_\_\_

**3.** Bieten Sie in Ihrer Praxis eine Demenzdiagnostik an?

- Ja    Nein, inzwischen nicht mehr (abgeschafft)    Nein, noch nie

**- Falls ‚Nein‘: Bitte direkt zu Frage 6 übergehen -**

**4.** Welche Testverfahren führen Sie in der Praxis zur Früherkennung von Demenz durch? (Mehrfachangabe möglich)

- Mini-Mental-Status-Test (MMST)    DemTect    Uhrentest    Montreal Cognitive Assessment (MoCA)  
 Geldzähltest nach Nikolaus    Test zur Früherkennung von Demenzen mit Depressionsabgrenzung (TFDD)  
 Sonstige, und zwar: \_\_\_\_\_

**5.** Kommen Demenztests bei Ihnen ausschließlich im Verdachtsfall bzw. zur Verlaufskontrolle zum Einsatz oder auch zu Screeningzwecken?

- Ausschließlich im Verdachtsfall bzw. zur Verlaufskontrolle    Auch zu Screeningzwecken  
 Überwiegend im Rahmen des Geriatrischen Basisassessments (GBA)

**6.** Überweisen Sie Patienten mit Verdacht auf Demenz in der Regel zur weiteren Abklärung?

(Mehrfachangabe möglich)

- Ja, zum niedergelassenen Neurologen/Psychiater  
 Ja, zur Spezialambulanz für Gedächtnisstörungen (vorausgesetzt, eine solche befindet sich in einer für Patienten zumutbaren Entfernung)  
 Überweise in der Regel nicht

**7.** Sind Sie in der Regel in die Therapie von Demenzpatienten eingebunden, oder überlassen Sie dies ausschließlich dem neurologischen bzw. psychiatrischen Spezialisten?

- In der Regel in Therapie eingebunden  Nur in Einzel-/Ausnahmefällen  Überlasse ausschließlich Spezialist

**Hinweis:** Die nachfolgenden Fragen beziehen sich nicht unmittelbar auf Ihre Praxis, sondern auf Ihre generellen Einschätzungen hinsichtlich der hausärztlichen Demenzversorgung.

**8.** Wie würden Sie das generell einschätzen: Wie leicht oder schwer ist es im Alltag für den Hausarzt, bei Patienten eine beginnende Demenz zu erkennen?

- Sehr schwer  Eher schwer  Eher leicht  Sehr leicht

**9.** Gelegentlich hört und liest man, dass in vielen Hausarztpraxen die Diagnose Demenz häufig erst in relativ fortgeschrittenem Stadium gestellt wird. Woran liegt das Ihrer Ansicht nach? Einige Stichpunkte genügen.

---



---



---

**10.** Die hausärztliche Demenzversorgung bringt verschiedene Herausforderungen mit sich. Bitte geben Sie jeweils an, für wie groß Sie die folgenden Herausforderungen tendenziell halten.

|                                                                                                                      | Sehr groß             | Eher groß             | Eher gering           | Sehr gering           |
|----------------------------------------------------------------------------------------------------------------------|-----------------------|-----------------------|-----------------------|-----------------------|
| Differenzialdiagnostische Abgrenzung einer Demenz von anderen Formen kognitiver Beeinträchtigungen (z.B. Depression) | <input type="radio"/> | <input type="radio"/> | <input type="radio"/> | <input type="radio"/> |
| Sicherstellung der Akzeptanz und Kooperation des Patienten bei der Durchführung von Demenztests                      | <input type="radio"/> | <input type="radio"/> | <input type="radio"/> | <input type="radio"/> |
| Aufklärung des Patienten über die Diagnose und Sicherstellung der Compliance                                         | <input type="radio"/> | <input type="radio"/> | <input type="radio"/> | <input type="radio"/> |
| Kommunikation mit pflegenden Angehörigen                                                                             | <input type="radio"/> | <input type="radio"/> | <input type="radio"/> | <input type="radio"/> |
| Erfolgreiche therapeutische Begleitung von Demenzerkrankten                                                          | <input type="radio"/> | <input type="radio"/> | <input type="radio"/> | <input type="radio"/> |
| Beratung und Versorgung von Demenzpatienten, die sich kostendeckend für die Praxis darstellt                         | <input type="radio"/> | <input type="radio"/> | <input type="radio"/> | <input type="radio"/> |

**11.** Hier stehen verschiedene Aussagen von Allgemeinmedizinern, die im Rahmen einer Interviewstudie erfasst wurden. Wie stark stimmen Sie der jeweiligen Aussage zu?

|                                                                                                                                                                                                           | Stimme voll und ganz zu | Stimme eher zu        | Stimme eher nicht zu  | Stimme gar nicht zu   |
|-----------------------------------------------------------------------------------------------------------------------------------------------------------------------------------------------------------|-------------------------|-----------------------|-----------------------|-----------------------|
| <i>„Patienten mit Demenz sollten maßgeblich durch Fachärzte wie Neurologen oder Psychiater betreut werden, nicht durch den Hausarzt.“</i>                                                                 | <input type="radio"/>   | <input type="radio"/> | <input type="radio"/> | <input type="radio"/> |
| <i>„Im Bereich Demenz fehlt es an wirtschaftlichen Anreizen, warum ein Hausarzt sich damit befassen sollte – die Honorierung müsste deutlich besser sein.“</i>                                            | <input type="radio"/>   | <input type="radio"/> | <input type="radio"/> | <input type="radio"/> |
| <i>„Es bringt im Prinzip kaum Vorteile, eine Demenz im Frühstadium zu erkennen, da die therapeutische Konsequenz unzureichend ist.“</i>                                                                   | <input type="radio"/>   | <input type="radio"/> | <input type="radio"/> | <input type="radio"/> |
| <i>„Die Diagnose Demenz bedeutet für viele Patienten einen Angriff auf die Entscheidungsautonomie und erzeugt mir gegenüber starke Abwehrhaltungen, was die weitere Patientenversorgung einschränkt.“</i> | <input type="radio"/>   | <input type="radio"/> | <input type="radio"/> | <input type="radio"/> |

**12.** Wie beurteilen Sie aus eigener Erfahrung die Zusammenarbeit zwischen Hausärzten und Fachärzten (Neurologen, Psychiater), wenn es um die Erkennung und Versorgung von Demenzpatienten geht?

- Sehr gut       Eher gut       Eher schlecht       Sehr schlecht

**13.** Wie beurteilen Sie die Zusammenarbeit zwischen Hausärzten und Alten- bzw. Pflegeheimen, wenn es um die Erkennung und Versorgung von Demenzpatienten geht?

- Sehr gut       Eher gut       Eher schlecht       Sehr schlecht

**14. Bei der Zusammenarbeit zwischen Hausärzten und Fachärzten im ambulanten Bereich zur Erkennung und Versorgung von Demenzpatienten können verschiedene Schwierigkeiten auftreten. Wie häufig treten die folgenden Schwierigkeiten Ihrer Erfahrung nach auf?**

Neurologische/psychiatrische Fachärzte sind für die Patienten schlecht erreichbar.

- Häufig                       Gelegentlich                       Selten                       Nie

Es fehlt im Praxisalltag die erforderliche Zeit, um sich mit den Kollegen über die meist komplexen Patientenprobleme auszutauschen.

- Häufig                       Gelegentlich                       Selten                       Nie

Die niedergelassenen neurologischen/psychiatrischen Fachärzte sind auf lange Zeit ausgebucht.

- Häufig                       Gelegentlich                       Selten                       Nie

Man muss lange warten, bis die neurologischen/psychiatrischen Fachärzte ihre Befunde weiterleiten.

- Häufig                       Gelegentlich                       Selten                       Nie

Neurologische/psychiatrische Fachärzte informieren den Hausarzt nicht ausreichend über die von ihnen durchgeführten Untersuchungen, Ergebnisse und/oder gestellte Diagnosen.

- Häufig                       Gelegentlich                       Selten                       Nie

Neurologische/psychiatrische Fachärzte greifen zu nicht nachvollziehbarer oder nicht für Demenz zugelassener Medikation von Demenzpatienten.

- Häufig                       Gelegentlich                       Selten                       Nie

Die Patienten werden vom neurologischen/psychiatrischen Facharzt nicht ausreichend über ihre Situation aufgeklärt und kehren aus Unsicherheit zum Hausarzt zurück.

- Häufig                       Gelegentlich                       Selten                       Nie

Es gibt zu wenige neurologische/psychiatrische Praxen in der Nähe.

- Häufig                       Gelegentlich                       Selten                       Nie

**15. Was würden Sie sagen: Wie gut kennen Sie sich mit den regionalen Versorgungsstrukturen zur Betreuung von Demenzpatienten aus? (z.B. Demenz-Netzwerke, Arbeit und Service der Pflegestützpunkte)**

- Sehr gut                       Eher gut                       Eher nicht so gut                       Gar nicht

**16. Arbeiten Sie bei der Betreuung von Demenzpatienten mit anderen Einrichtungen/Diensten zusammen?**

- Ja, mit folgenden Einrichtungen/Diensten:

\_\_\_\_\_

- Nein

**17. Für wie hilfreich halten Sie die folgenden Maßnahmen, um die Früherkennung von Demenz in der Hausarztpraxis wirksam zu verbessern?**

Konsequentes und regelmäßiges Screening bei älteren Patienten ab einer bestimmten Altersgrenze (z.B. ab 70 Jahren)

Sehr hilfreich  Eher hilfreich  Weniger bzw. gar nicht hilfreich

Etablierung eines strukturierten Diagnose- und Therapiealgorithmus, der Hausärzten ein Verhaltens- und Orientierungsschema zur systematischen Demenzerkennung gibt

Sehr hilfreich  Eher hilfreich  Weniger bzw. gar nicht hilfreich

Verstärkte Zusammenarbeit zwischen Hausärzten und regionalen Unterstützungsnetzwerken (z.B. Demenz-Netzwerke, Pflegestützpunkte)

Sehr hilfreich  Eher hilfreich  Weniger bzw. gar nicht hilfreich

Bessere Honorierung der Hausärzte bei demenzbezogenen Beratungs-, Diagnose- und Versorgungsleistungen

Sehr hilfreich  Eher hilfreich  Weniger bzw. gar nicht hilfreich

Verstärkte Schulung der Praxismitarbeiter hinsichtlich der Früherkennung von Demenz sowie Demenzdiagnostik

Sehr hilfreich  Eher hilfreich  Weniger bzw. gar nicht hilfreich

**18. Haben Sie in Ihrer Praxis Mitarbeiter, die auf dem Gebiet Demenz speziell geschult sind? (Gemeint ist der Besuch entsprechender Fortbildungen.)**

Ja  Nein

**19. Wie kompetent fühlen Sie sich, wenn es um das Thema Früherkennung von Demenz im Allgemeinen geht?**

Sehr kompetent  Eher kompetent  Eher nicht so kompetent

**20. Wie groß wäre Ihr Interesse, an einer Fortbildung zum Thema Demenz teilzunehmen?**

Sehr groß  Eher groß  Eher nicht so groß  Kein Interesse

**21. Unabhängig davon, ob die Teilnahme an einer Fortbildung zum Thema Demenz für Sie in Frage kommt oder nicht: Welche der folgenden Themengebiete würden Sie im Rahmen einer solchen Veranstaltung interessieren? Bitte stufen Sie ab.**

Kein Interesse  Sehr großes Interesse

|                                                                                                                                 | 0                     | 1                     | 2                     | 3                     | 4                     |
|---------------------------------------------------------------------------------------------------------------------------------|-----------------------|-----------------------|-----------------------|-----------------------|-----------------------|
| Demenz-Leitlinien                                                                                                               | <input type="radio"/> | <input type="radio"/> | <input type="radio"/> | <input type="radio"/> | <input type="radio"/> |
| Schritte hin zum Demenzverdacht und weiteres Vorgehen                                                                           | <input type="radio"/> | <input type="radio"/> | <input type="radio"/> | <input type="radio"/> | <input type="radio"/> |
| Diagnostik und Testverfahren (Durchführung des Diagnostikprozesses und Interpretation)                                          | <input type="radio"/> | <input type="radio"/> | <input type="radio"/> | <input type="radio"/> | <input type="radio"/> |
| Therapieformen (insbesondere Antidementiva und andere Psychopharmaka)                                                           | <input type="radio"/> | <input type="radio"/> | <input type="radio"/> | <input type="radio"/> | <input type="radio"/> |
| Gesprächsführung mit an Demenz Erkrankten (z.B. Validationstechniken)                                                           | <input type="radio"/> | <input type="radio"/> | <input type="radio"/> | <input type="radio"/> | <input type="radio"/> |
| Kommunikation mit pflegenden Angehörigen und deren Einbindung (Empfehlungen, Vermeidung einer Überlastung von Angehörigen etc.) | <input type="radio"/> | <input type="radio"/> | <input type="radio"/> | <input type="radio"/> | <input type="radio"/> |
| Aufklärung über Diagnose und Sicherstellung der Compliance                                                                      | <input type="radio"/> | <input type="radio"/> | <input type="radio"/> | <input type="radio"/> | <input type="radio"/> |
| Regionale Versorgungs- und Betreuungsangebote bei Demenz (Pflegestützpunkte, Demenz-Netzwerke)                                  | <input type="radio"/> | <input type="radio"/> | <input type="radio"/> | <input type="radio"/> | <input type="radio"/> |
| Rechtliche Aspekte (Vorsorgevollmacht, Betreuung, „Autofahren“)                                                                 | <input type="radio"/> | <input type="radio"/> | <input type="radio"/> | <input type="radio"/> | <input type="radio"/> |

**22. In welcher Form würden Sie eine solche Fortbildung bevorzugt in Anspruch nehmen?**

- Als Fortbildung vor Ort    Als Online-Fortbildung    Als Fortbildungs-DVD    Als Fortbildungs-Buch oder -Heft

Sonstiges : \_\_\_\_\_

*Nun bräuchten wir noch einige statistische Angaben von Ihnen. Wie auch der Rest des Fragebogens werden diese Informationen natürlich streng vertraulich behandelt und anonymisiert.*

**Geschlecht:**

- Männlich     Weiblich     Divers

Ihr **Alter:** \_\_\_\_\_

**Ihr Bundesland:**

- Hessen     Baden-Württemberg

**Wo befindet sich Ihre Praxis?** In einer Gemeinde/Stadt mit . . .

- mehr als 100.000     20.000-100.000     5.000 bis 20.000     unter 5.000 Einwohnern

**Welches Niederlassungsmodell** beschreibt Ihre Praxis am besten?

- Einzelpraxis (Sie sind der/die einzige Arzt/Ärztin)     Einzelpraxis mit angestellten Ärzten  
 Gemeinschaftspraxis     Medizinisches Versorgungszentrum

**Wie viele Ärzte** sind in Ihrer Praxis tätig?

- 1 Arzt     2 Ärzte     3 Ärzte     Mehr als drei Ärzte

**Wie viele Patienten** behandelt Ihre Praxis im Quartal?

- 500-750     751-1000     1001-1500     Mehr als 1500

Verfügen Sie über die **Fachkunde Geriatrie** oder eine adäquate Weiterbildung?

- Ja     Nein

**Vielen Dank für Ihre Teilnahme!**

**Sollten Sie diese Befragung schriftlich ausgefüllt haben, nutzen Sie bitte den von uns beigefügten Rückumschlag.**

Was möchten Sie uns noch mitteilen?

Hier finden Sie Platz für Anregungen, Kommentare und Kritik.

---

---

---
